# Supplementary material for: Maternal Hepatitis B Virus Infection and Pregnancy Outcomes of Freeze-Thaw Embryo Transfer
Source: PubMed Central journal article supplement (PMC10349339; doi:10.1001/jamanetworkopen.2023.23495), 2023-07-14
Supplement: jamanetwopen-e2323495-s002.pdf [file jamanetwopen-e2323495-s002.pdf]

## Data Sharing Statement

Ruan. Maternal Hepatitis B Virus Infection and Pregnancy Outcomes of Freeze-Thaw Embryo Transfer. *JAMA Netw Open*. Published July 14, 2023.  
doi:10.1001/jamanetworkopen.2023.23495

### Data

**Data available:** No
